# Supplementary material for: Natural Occurrence of Escherichia coli-Infecting Bacteriophages in Clinical Samples
Source: Front Microbiol. 2019 Oct 31;10:2484. doi: 10.3389/fmicb.2019.02484 (PMC6834657; doi:10.3389/fmicb.2019.02484)
Supplement: Supplementary file 2 [file Table_2.XLSX]

## Sheet: 12474V
vB_EcoM-12474V	ftype	length_bp	product	vB_EcoM-12474II	vB_EcoM-12474III	vB_EcoM-12474IV	Homologue
OMJLAAIH_00001	CDS	1119	hypothetical phage protein	LLFFHNDI_00001	BBAMJIOM_00004	PBINGOGM_00001	L-413Cp40, Yersinia virus L413C, NC_004745
OMJLAAIH_00002	CDS	993	hypothetical protein	LLFFHNDI_00002	BBAMJIOM_00005	PBINGOGM_00002	MULTISPECIES: hypothetical protein [Escherichia]
OMJLAAIH_00003	CDS	939	DNA cytosine methylase	LLFFHNDI_00003	BBAMJIOM_00006	PBINGOGM_00003
OMJLAAIH_00004	CDS	234	hypothetical phage protein	LLFFHNDI_00004	BBAMJIOM_00007	PBINGOGM_00004	ORF67, Enterobacteria phage P2-EC31, AM157367
OMJLAAIH_00005	CDS	453	hypothetical phage protein	LLFFHNDI_00005	BBAMJIOM_00008	PBINGOGM_00005	ORF151, Enterobacteria phage P2-EC31, AM157367
OMJLAAIH_00006	CDS	2307	Replication gene A protein	LLFFHNDI_00006	BBAMJIOM_00009	PBINGOGM_00006
OMJLAAIH_00007	CDS	276	hypothetical phage protein	LLFFHNDI_00007	BBAMJIOM_00010	PBINGOGM_00007	gp83, Escherichia virus Wphi, NC_005056
OMJLAAIH_00008	CDS	225	putative zinc-finger containing protein	LLFFHNDI_00008	BBAMJIOM_00011	PBINGOGM_00008
OMJLAAIH_00009	CDS	300	hypothetical phage protein	LLFFHNDI_00009	BBAMJIOM_00012	PBINGOGM_00009	L-413Cp35, Yersinia virus L413C, NC_004745
OMJLAAIH_00010	CDS	225	hypothetical phage protein	LLFFHNDI_00010	BBAMJIOM_00013	PBINGOGM_00010	SP004_00165, Salmonella phage FSL SP-004, NC_021774
OMJLAAIH_00011	CDS	501	Replication gene B protein	LLFFHNDI_00011	BBAMJIOM_00014	PBINGOGM_00011
OMJLAAIH_00012	CDS	198	hypothetical phage protein	LLFFHNDI_00012	BBAMJIOM_00015	PBINGOGM_00012	SP004_00155, Salmonella phage FSL SP-004, NC_021774
OMJLAAIH_00013	CDS	273	Regulatory protein cox	LLFFHNDI_00013	BBAMJIOM_00016	PBINGOGM_00013
OMJLAAIH_00014	CDS	294	Repressor protein C	LLFFHNDI_00014	BBAMJIOM_00017	PBINGOGM_00014
OMJLAAIH_00015	CDS	981	Integrase	LLFFHNDI_00015	BBAMJIOM_00018	PBINGOGM_00015
OMJLAAIH_00016	CDS	300	putative positive regulator of late gene transcription	LLFFHNDI_00016	BBAMJIOM_00019	PBINGOGM_00016
OMJLAAIH_00017	CDS	1164	putative phage control protein D	LLFFHNDI_00017	BBAMJIOM_00020	PBINGOGM_00017
OMJLAAIH_00018	CDS	480	Tail protein	LLFFHNDI_00018	BBAMJIOM_00021	PBINGOGM_00018
OMJLAAIH_00019	CDS	2448	Tail tape measure protein	LLFFHNDI_00019	BBAMJIOM_00022	PBINGOGM_00019
OMJLAAIH_00020	CDS	276	Tail protein	LLFFHNDI_00020	BBAMJIOM_00023	PBINGOGM_00020
OMJLAAIH_00021	CDS	519	Tail tube protein	LLFFHNDI_00021	BBAMJIOM_00024	PBINGOGM_00021
OMJLAAIH_00022	CDS	1191	Tail sheath protein	LLFFHNDI_00022	BBAMJIOM_00025	PBINGOGM_00022
OMJLAAIH_00023	CDS	1083	hypothetical protein	LLFFHNDI_00023	BBAMJIOM_00026	PBINGOGM_00023	MULTISPECIES: hypothetical protein [Escherichia]
OMJLAAIH_00024	CDS	528	Tail fiber assembly protein U	LLFFHNDI_00024	BBAMJIOM_00027	PBINGOGM_00024
OMJLAAIH_00025	CDS	1929	Tail fiber protein	LLFFHNDI_00025	BBAMJIOM_00028	PBINGOGM_00025
OMJLAAIH_00026	CDS	531	Tail protein	LLFFHNDI_00026	BBAMJIOM_00029	PBINGOGM_00026
OMJLAAIH_00027	CDS	909	baseplate assembly protein J	LLFFHNDI_00027	BBAMJIOM_00030	PBINGOGM_00027
OMJLAAIH_00028	CDS	348	putative baseplate protein	LLFFHNDI_00028	BBAMJIOM_00031	PBINGOGM_00028
OMJLAAIH_00029	CDS	636	Spike protein	LLFFHNDI_00029	BBAMJIOM_00032	PBINGOGM_00029
OMJLAAIH_00030	CDS	786	hypothetical phage protein	LLFFHNDI_00030	BBAMJIOM_00033	PBINGOGM_00030	P2p15, Escherichia virus P2, NC_001895
OMJLAAIH_00031	CDS	453	Tail protein	LLFFHNDI_00031	BBAMJIOM_00034	PBINGOGM_00031
OMJLAAIH_00032	CDS	468	Tail protein	LLFFHNDI_00032	BBAMJIOM_00035	PBINGOGM_00032
OMJLAAIH_00033	CDS	159	putative lysC	LLFFHNDI_00033	BBAMJIOM_00036	PBINGOGM_00033
OMJLAAIH_00034	CDS	444	putative lysB	LLFFHNDI_00034	BBAMJIOM_00037	PBINGOGM_00034
OMJLAAIH_00035	CDS	426	putative lysA	LLFFHNDI_00035	BBAMJIOM_00038	PBINGOGM_00035
OMJLAAIH_00036	CDS	498	Endolysin	LLFFHNDI_00036	BBAMJIOM_00039	PBINGOGM_00036
OMJLAAIH_00037	CDS	282	Holin	LLFFHNDI_00037	BBAMJIOM_00040	PBINGOGM_00037
OMJLAAIH_00038	CDS	204	Baseplate protein X	LLFFHNDI_00038	BBAMJIOM_00041	PBINGOGM_00038
OMJLAAIH_00039	CDS	510	Head completion/stabilization protein	LLFFHNDI_00039	BBAMJIOM_00042	PBINGOGM_00039
OMJLAAIH_00040	CDS	744	small terminase subunit	LLFFHNDI_00040	BBAMJIOM_00043	PBINGOGM_00040
OMJLAAIH_00041	CDS	1074	Capsid proteins	LLFFHNDI_00041	BBAMJIOM_00044 (432bp)	PBINGOGM_00041
OMJLAAIH_00042	CDS	855	Capsid assembly scaffolding protein	LLFFHNDI_00042	BBAMJIOM_00001	PBINGOGM_00042
OMJLAAIH_00043	CDS	1773	terminase	LLFFHNDI_00043	BBAMJIOM_00002	PBINGOGM_00043
OMJLAAIH_00044	CDS	1035	putative portal protein	LLFFHNDI_00044	BBAMJIOM_00003	PBINGOGM_00044

## Sheet: 12474V_annotated features
>OMJLAAIH_00001 hypothetical phage protein
MTESLDYIDLNKLELDTKNPRLPEGVERTPEAMLNHIALTTSIEDLMNAIAENGFFPGEP
LIAVKEGDKYTVVEGNRRLTAVKLIHNPYECDRPSSRMIEIAESAKDKLGTLEKLPVIVR
DTRAEILPYLGFRHITGVKQWEPLSKARYIEQLFGLTSPNSPTNDRYHQVARAIGSRKDH
IKRNLDALAVYKVMESNNFYDIDGLDEESIKFSILSTALADEKIGLFVGVSEKDEYGDIT
SNDVIIHPHHINRENTRELTLWLYKKDDSGKTKVGESRNLRLLSSVIDNPKALTSFRNGA
DLKVAYQLTEDLKQDFMTLLYKAESALIEAAGIVATIDYNPEALEVARRLSQNVKLIGNT
IKAKKVSDDEDF
>OMJLAAIH_00002 hypothetical protein
MKIFKIGDIHPSVPHLFADLAELATVINYSGRYDLHKNDLITIRTQSNTSVDDIDQEYQE
DENEGCDAERNDRLERQVEDVWTQLDFRQNFLKDIYPFIINGDFISLKENLTEIQRIYIF
LLACSRLRSFTKARQGIIQFWAKNFAVVSKFCATALLPAHSTVRVFDANSDDRRKYYGTD
LRKALKRLGKDLAVPYINEQECERADPRGDGGFDIVATIEFEDKLSSNFAFLGQCGAQER
DWPKKTLEAHSLKLRTYFQVHFDIPTLMFTPVFYRNSDGQWVDNSPCAGVLIIDRARILQ
LLKKTNHCPKIVSEQWFLDFEQIINDLKVE
>OMJLAAIH_00003 DNA cytosine methylase
MPTVVSLFSGCGGSDAGVLRAGFNVLMANDILPYARDVYLENHPETDYILGDISGLQSFP
SAELLIGCYPCQGFSQGGARKADRKINTLYLEFARALRKIKPKAFIVENVSGMVRRNFEH
LLKDQFKVFEEAGYTVSSQILNASHYGVSQDRKRIFIVGIRKDYGITYKFPKPTHGDGLK
PYSTIRDAIGHMPVWPIGEFYDADFHWYYLSRNRRQDWDQISKTIVANPRHMPLHPISPT
LEKLGPDKWQFTSDAPARRFSYREAAILQGFGDLIFPETERASINMKYTVVGNAVPPPLF
EAVAKSLPDIWD
>OMJLAAIH_00004 hypothetical phage protein
MHRIPGEIPQHKTKNIKLMAIVHRLQQIMVNENLTPDELVGCAEMVRDNYRRFNDISRQK
IEVFRPANMPKKLPHRM
>OMJLAAIH_00005 hypothetical phage protein
MAKIHEVKLHAKYFDLVLEGKKRAEFRKNDRNYERGDTLILHEWVQGVFTGRKVEARITD
VTDLSDWLEDYVLLSIELLNTSAYEIVNWKELSERGLVFRINHEIMHQLGLAVMYEPETG
VSGGAMVATDGAWNYSDEQMERAQQNGWLG
>OMJLAAIH_00006 Replication gene A protein
MAVKASGRFVPPSAFAAGTGKAFTGAYAWNAPREAVGRERPLTRDEMRQVQGVLSTINRL
PYFLRSLFTSRYDYIRRNKSPVHGFYFLTSTFQRRLWPRIERVNQRHEMNTDASLLFLAE
RDHYARLPGMNDKELKKFAARISSQLFMMYEELSDAWVDAHGEKESLFTDEAQAHLYGHV
AGAARAFNISPLYWKKYRKGQMTTRQAYSAIARLFNDEWWAHQLKGQRMRWHEALLIAVG
AVNKDRSPYASKHAIRDVRARRQANLEFLKSCDLENRETGERIDLISKVMGSISNPEIRR
MELMNTIAGIERYAAAEGDVGMFITLTAPSKYHPTRQVGKGESKTVQLNHGWNHEAFNPK
DAQRYLCRIWSLMRTAFKDNDLQAYGLRVVEPHHDGTPHWHMMLFCNPRQRNQIIEIMRR
YALKEDGDERGAARNRFQAKHLNRGGAAGYIAKYISKNIDGYALDGQLDNDTGRPLKDTA
AAVTAWASTWRIPQFKTVGLPTMGAYRELRKLPRGVSIADEFDERVEAARAAADSGDFAL
YISAQGGANVPRDCQTVRVARSPSDEVNEYEEEVERVVGIYAPHLGARHIHITRTTDWRI
VPKVPVVEPLTLKSGIAAPRSPVNNCGKLTGGDTSLPAPTPSERAAAVLNLVDDGVIEWN
DPEVVRALRGALKHGLRTPNRQQRNGSPLKPNEIAPSARLTRSERMQITRIRVDLAQNGI
WPQRWELEALARGATVNYDGKKFTYLVADVWPGFSTVMEWTSWQKFTR
>OMJLAAIH_00007 hypothetical phage protein
MSIRIEIGERYVVTSDSFQFILHEKKRAESGKNVGQEWLAVVGYYPKLSQLVSGLMHHDI
LTGSAKSFADLNAQVEQLSKRCSEAFGSYGR
>OMJLAAIH_00008 putative zinc-finger containing protein
MPDNVDFIQEQQAELLERQINAARVKHCGASALVCEECDAPIPAARRAAYPSATRCVSCQ
SVFEAKNKHYRRTA
>OMJLAAIH_00009 hypothetical phage protein
MSCSHSVVLLNNALKIAVMKNGDLSLIQLCLDKEKRDITESVIAIYQNELNLLSDVVNLL
VKRAVFHKQISSVDELTKLTTELASYCADVSRKLNDKRS
>OMJLAAIH_00010 hypothetical phage protein
MHTVSENQCGKYALLLQQARTEAQADAATRFSSHLDAMIRHITKAELSRVEIVELLSQES
EKFHNIGLSRGEVL
>OMJLAAIH_00011 Replication gene B protein
MTVMTLNLVEKQPAAMRRIIGKHLAVPRWQDTCDYYNQMMERERLTVCFHAQLKQRHATM
RFEEMNDVERERLVCAIDELRGAFSKRRQVGASEYAYISFLTVSQRRTLFMHAGLTEKEF
NQPYWRINEESCYWRDALFRALRELFSLFEYAPTILTSVKPEQYLH
>OMJLAAIH_00012 hypothetical phage protein
MAFVDGVVIMSEPRYIAQLLRNESPRAIDFTITHGKGRKGIIIRTKKQSPLKKALTFLKS
RRVWK
>OMJLAAIH_00013 Regulatory protein cox
MEVNDYVIQYPIDAVHTVKFAELLGKPETAVVKMVKENKLPVIELRDPSKPNARVGEKWV
FIPEFNRAVREAFYNRPVEQRDAWLLWMGL
>OMJLAAIH_00014 Repressor protein C
MQTFEKLKAIRKAEGLTQAKFSEISGIALGTVKNYESGHKDPGLSIVMRVTNTPLFKKYT
LWLMTGDTSPQAGQIAPALAHIGQKPTESDHSEKQTG
>OMJLAAIH_00015 Integrase
MSIKKLDDGRYEVDIRPRGRDGKRIRRKFERKAEAVAFERYTIAYASQKEWAGQRADRRT
LSELLDIWWKYHGQNHEHGTKEFNHLLKTISGIGDIPVSRMSKRALMDYRSMRLRDGISA
ATINRDMYRLSGMFTKLIQLDEFSGQHPIHGLPPLAEANPEMTFLEKAEIEKLLNVLDGD
DLLVALLCLSTGGRWTEVATLKPAQITNCRVTFLKTKNGKKRTVPISEELEKKVKEEASA
KLFKVDYEKFCGILRRVKPDIPPNQATHILRHTFASHFMMNGGNIIALQQILGHASIQQT
MAYAHLAPDYLQNAVALNPLKGGVTL
>OMJLAAIH_00016 putative positive regulator of late gene transcription
MFSFICLFYKDKLNKMAPLTKPEEVLAMFHCPLCQHAAHARTSRYITDTTKERYHQCQNV
NCSATFITYESVQRYIVKPGEVHAVRPHPLPSGQQIMWM
>OMJLAAIH_00017 putative phage control protein D
MLDALTFDAGSTLTPDYMLMLDSRDITGNISDRLMSMTLTDNRGFEADQLDIELNDADGQ
VGLPVRGAVLTVYIGWKGFALVCKGKFTVDEVEHRGAPDVVTIRARSADFRGTLNSRREG
SWHDTTLGAIVEAIASRNRLEASVAPSLAGIKIPHIDQSQESDAKFLTRLAERNGGEVSV
KMGKLLFLKVGQGVTASGKKIPQITITRSDGDRHHFAIADRGAYTGVTAKWLHTKDPKPQ
KQKVKLKRKKKEKHLRALEHPKAKPVTQKKAPKAPEAREGEYMAGEADNVFALTTVYATK
AQAMRAAQAKWDKLQRGVAEFSISLATGRADIYTETPVRVSGFKRVIDEQDWTITKVTHF
LNNSGFTTSLELEVRLSDVEYETEDDD
>OMJLAAIH_00018 Tail protein
MMLALGMFVFMRQTLPHQTMQRESDYRWPSNSRIGKRDAFQFLGVGEENITLAGVLYPEL
TGGKLTMTTLRLMAEEGRAWPLLDGTGMIYGMYVISKVSETGSIFFADGTPRKIDFTLSL
TRVDESLAALYGDIGKQAESLIGKAGSIATKFTGMTEAG
>OMJLAAIH_00019 Tail tape measure protein
MSNNVKLQVLLRAVDQASRPFKSIRTASKSLSGDIRETQKSLRELNGHASRIEGFRKTSA
QLAVTGHALEKARQEAEALATQFKNTERPTRAQAKVLESAKRAAEDLQAKYNRLTDSVKR
QQRELAAVGINTRNLAHDEQGLKSRISETTVQLNRQRDALARVSAQQAKLNAVKQRYQAG
KELAGNMASVGAAGVGIAAAGTMAGVKLLMPGYEFAQKNSELQAVLGVAKDSTEMAALRK
QARQLGDNTAASADDAAGAQIIIAKAGGDVDAIQAATPVTLNMALANRRTMEENAALLMG
MKSAFQLSNDKVAHIGDVLSMTMNKTAADFDGMSDALTYAAPVAKNAGVSIEETAAMVGA
LHDAKITGSMAGTGSRAVLSRLQAPTGKAWDALKELGVKTSDSKGNTRPVFTILKEMQAS
FEKNRLGTAQQAEYMKTIFGEEASSAAAVLMTAASTGKLDKLTAAFKASDGKTAELVNIM
QDNLGGDFKEFQSAYEAVGTDLFDQQEGALRKLTQTATKYVLKLDGWIQKNKSLASTIGI
IVGGALALTGVIGAIGLIAWPVITGINAIIAAAGAMGAIFTTVGSAVMTAIGAISWPVVA
VVAAIVAGALLIRKYWEPVSAFFGGVVEGLKAAFAPVGELFTPLKPVFDWLGEKLQAAWQ
WFKNLIAPVKATQDTLNRCRDTGVMFGQALADALMLPLNAFNKLRSGIDWVLEKLGVINK
ESDTLDQTAARTQAATYGSGGYIPATSSYAGYQAYQPVTAPAGRSYVDQSKNEYHISLTG
GTAPGTQLDRQLQDALEKYERDKRARARASMMHDG
>OMJLAAIH_00020 Tail protein
MNKENVITLDNPVKRGEQVIEQVTLMKPNAGTLRGVSLAAVANSEVDALIKVLPRMTAPM
LTEQEVAALELPDLVALAGKVVGFLSPNSVQ
>OMJLAAIH_00021 Tail tube protein
MAMPRKLKLMNVFLNGYSYQGVAKSVTLPKLTRKLENYRGAGMNGSAPVDLGLDDDALSM
EWSLGGFPDSVIWELYAATGVDAVPIRFAGSYQRDDTGETVAVEVVMRGRQKEIDTGEGK
QGEDTESKISVVCTYFRLTMDGKELVEIDTINMIEKVNGVDRLEQHRRNIGL
>OMJLAAIH_00022 Tail sheath protein
MSDYHHGVQVLEINDGTRVISTVSTAIVGMVCTASDADAEIFPLNKPVLITNVQSAIAKA
GKKGTLAASLQAIADQSKPVTVVVRVEDGTGDDEETKLAQTVSNIIGTTDENGQYTGLKA
LLAAESVTGVKPRILGVPGLDTKEVAVALASVCQKLRAFGYISAWGCKTISEVKAYRQNF
SQRELMVIWPDFLAWDTVTSITATAYATARALGLRAKIDQEQGWHKTLSNVGVNGVTGIS
ASVFWDLQESGTDADLLNESGVTTLIRRDGFRFWGNRTCSDDQLFLFENYTRTAQVLADT
MAEAHMWAVDKPITATLIRDIVDGINAKFRELKTNGYIVDATCWFSEESNDAETLKAGKL
YIDYDYTPVPPLENLTLRQRITDKYLANLVTSVNSN
>OMJLAAIH_00023 hypothetical phage protein
MKPEQMKNREELTSFATKLATQIKMQTSSNLNDLSTAQESSLLPLINHAWGEQFEDMNRI
SQNYPGLDYVQPGKRLGLQMTATARKVKYQKTLDKLRNNEKLKGKFDEIWFFVLTAERLP
DNVREHPDDFQCKYFTLYDLVEKVMGQTLEFQRDFLTLARKEYSDYFSPGDVAFNQGYCV
SENKPIPFDLSLFNALIHTNEWFDDVDEGEQIVYEFLELFKNRLRQCTLSARNLLSKIIS
EINIPKSTSTKIEFPEKQLFGPLMIDDTNYQSFSKDLDDLFEMSLIERWDNYVGMYYKGD
DAYIKNERMISVSFPKIEPEMNLYAALYIFYEKNHDIAKLVNAIENSDFSLLADSTCQNN
>OMJLAAIH_00024 Tail fiber assembly protein U
MQHLKNITAGNPKTVAQYQLTKNFDVVWLWSEDGKNWYEEVSNFQEDTIKIVYDENNIIV
GITRDASTLNPEGFSVVEVPDITANRRADDSGKWMFKDGAVIKRIYTADEQHQLAESQKA
TLLSEAESVILLLERAVRLNMATEEERSRLEAWERYSVLVSRVDPANPEWPEMPQ
>OMJLAAIH_00025 Tail fiber protein
MSTKFRTVITTAGAAKLAAATAPGGRKVNITTMAVGDGGGKLPVPDAGQTGLIHEVWRHA
LNKISQDKRNSNYIIAELVIPPEVGGFWMRELGLYDDAGTLIAVANMAESYKPALAEGSG
RSQTCRMVIIVSSVTSVELTIDTTTVMATQDYVDDKIAEHEQSRRHPDASLTAKGFTQLS
SATNSTSETLAATPKAVKAAYDLANGKYTAQDATTARKGLVQLSSATNSTSETLAATPKA
VKAAYDLANGKYTAQDATTARKGLVQLSSVTNSDSETLAATPKAVKAAYDLANGKYTAQD
ATTARKGLVQLSSAANSDSETLAATPKAVKSAYDNAEKRLQKDQNGADIPGKDTFTKNIG
ACRAYSGALSTEAGNWTTAQFIEWLDSRGAFNHPYWMCKCSWSYGNNKIITDTGCGTIHL
AGCVIEVMGNKGAMTIRVTTPSTSTGGGTTNAQFTYINHGDAYAPGWRRDYNTKNQQPAF
ALGQTGSRVANDKAVGWNWNSGVYDADISGASTLILHFNMNAGSCPAVQFRVNYKNGGIF
YRSARDGYGFEANWSEFYTTTRKPSAGDVGAYTKAESDSRYVRDIRLGTRVVQTMQKGVM
YEKSGHVITGLGIVGEVDGDDPAVFRPIQKYINGTWYNVAQV
>OMJLAAIH_00026 Tail protein
MSDSRLLPTGSSPLEVAAAKACAEIEKTPVSIRELWNPDTCPANLLPWLAWAFSVDRWDE
KWPEATKRAVIRDAYFIHCHKGTIGAIRRVVEPLGYLINVTEWWETSDPPGTFRLDIGVL
ESGITEAMYQEMERLIADAKPASRHLIGLNITRDIPGYLFAGGVAYDGDVITVYPG
>OMJLAAIH_00027 baseplate assembly protein J
MPIIDLNQLPAPDVVEELDFETILTERKATLISLYPEDQQEAVARTLTLESEPLVKLLEE
NAYRELIWRQRVNEAARAVMLACAAGNDLDVIGANYNTTRLTITPADDSTIPPTPAVMES
DTDYRLRIQQAFEGLSVAGSVGAYQYHGRSADGRVADISVTSPSPACVTISVLSRENNGV
ASEDLLAVVRNALNGEDVRPVADRVTVQSAAIVEYQINATLYLYPGPESEPIRAAAVKKL
EAYITAQHRLGRDIRLSAIYAALHVEGVQRVELAAPLADIVLNSTQASFCTEYRVVTGGS
DE
>OMJLAAIH_00028 putative baseplate protein
MTARYLGMNRSNGLTVTDLEHISQSIGDILRTPVGSRVMRRDYGSLLASMIDQPQTPALE
LQIKVACYMAVLKWEPRVTLSSVTTARSFDGRMTVTLTGQHNDTGQPLSLTIPVS
>OMJLAAIH_00029 Spike protein
MNTLANIQELARALRNMIRTGIIVETDLNAGRCRVQTGGMCTDWLQWLTHRAGRSRTWWA
PSVGEQVLILAVGGELDTAFVLPGIYSGDNPAPSASADALHIRFPDGAVIEYEPETSALT
ASGIKTASVTASDSVTATVPVVMVKASTRVTLDTPEVVCTNRLITGTLEVQKGGTMRGNI
EHTGGELSSNGKVLHTHKHPGDSGGTTGSPL
>OMJLAAIH_00030 hypothetical phage protein
MVSYNVTNVWGLIVFFLCSFAVLAFFSFGKSNLMRLIAHYFNFGYSDKKLKRLDREWRDI
QLFKIINGINVSGIENVRMIQQGLIDGKLKTSYFFLTRIWGDITKPPHIIKTIIVILASI
FYILLACYIHNKQSAIVRDAIGIPYKNMMYYVYSDKVLLSFNNKTVEFNKTYSLADCKRL
RNVFIKDTLPEIACNKLLQLNEEDSEWLSQEIKDNNSQKKALLIISLIYFISGLVIFLSY
TKFLYANKKVVEYKASNKNHS
>OMJLAAIH_00031 Tail protein
MNEFKRFEDRLAGLIESLSPSGRRRLSAELAKRLRQSQQRRVMAQKAPDGTPYAPRQQQS
ARKKTGRVKRKMFAKLITSRFLHIRASPEQASMEFYGGKSPKIASVHQFGLSEETRKNGK
KIDYPARPLLGFTGEDVQMIEEIILAHLER
>OMJLAAIH_00032 Tail protein
MLKPDSLRRALTDAVTVLKTNPDMLRIFVDNGSIASTLATSLSFEKRYTLNVIVTDFTGD
FDLLIVPVLAWLRENQPDIMTTDEGQKKGFTFYADINNDSSFDISISLMLTERTLVSEVD
GALHVKNIPEPTPPEPATRPMELYINGELVSKWDE
>OMJLAAIH_00033 putative lysC
MPGSDPQTNGDLSADIRQLENALARCASQVKMIKHCQDENDAQTRQPAQGAD
>OMJLAAIH_00034 putative lysB
MSKLMIVLVVLLSLAVAGLFLAKHENASLRASLDRANNVASEQQTTITMLKNQLHVALTR
ADKNELAQVALRQELENAAKREAQREKTITRLLNENEDFRRWYGADLPDAVRRLHQRPAC
TDASDCPQRLPESESLPDAGQRPADER
>OMJLAAIH_00035 putative lysA
MKKLSLSLMLNVSLALMLALSLIYPQSVAVSFVATWAILATVICVVAGGVGVYATEYVLE
RYGRELPPESLAVKIVTSLFLQPVRWRRRAAALVVMVATFIALVAAGWIFTALIYLVASV
FFRLIRKACRQRFEGREPCQS
>OMJLAAIH_00036 Endolysin
MPVINTHQNIAAFLDMLAVSEGTANHPLTKNRGYDVIVTGLDGKPEIFTDYSDHPFAHGR
PAKVFNRRGEKSTASGRYQQLYLFWPHYRKQLALPDFSPLSQDRLAIQLIRERGALDDIR
AGRIERAISRCRNIWASLPGAGYGQREHSLEKLVTVWRTAGGVPA
>OMJLAAIH_00037 Holin
MTAEEKSVLSLFMIGVLIVVGKVLAGGEPITPRLFIGRMLLGGFVSMVAGVVLVQFPDLS
LPAVCGIGSMLGIAGYQVIEIAIQRRFKGRGKP
>OMJLAAIH_00038 Baseplate protein X
MKTFALQGDTLDAICVRYYGRTEGVVETVLAANPGLAELGAVLPHGTAVELPDVQTAPVA
ETVNLWE
>OMJLAAIH_00039 Head completion/stabilization protein
MMTLIIPRKEAPVSGEGTVVIPQPAGDEPVIKNTFFFPDIDPKRVRERMRLEQTVAPARL
REAIKSGMAETNAELYEYREQKIAAGFTRLADVPADDIDGESIKVFYYERAVCAMATASL
YERYRGVDASAKGDKKADSIDSTIDELWRDMRWAVARIQDKPRCIVSQI
>OMJLAAIH_00040 small terminase subunit
MTSPAQRHMMRVSAAMTAQREAAPLRHATVYEQMLVKLAADQRTLKAIYSKELKAAKKRE
LLPFWLPWVNGVLEQGKGAQDDILMTVMLWRLDTGDIAGALEIARYALKYGLTMPGKHRR
TPPYMFTEEVALAAMRAHAAGESVDIRLLTETLELTATADMPDEVRAKLHKITGLFLRDG
GDAAGALAHLQRATQLDCQAGVKKEIERLERELKPKPEPQPKAATRAPRKIRSVTPAKRG
RPKKKAS
>OMJLAAIH_00041 Capsid proteins
MRQETRFKFNAYLSRVAELNGIDAGDVSKKFTVEPSVTQTLMNTMQESSDFLTRINIVPV
SEMKGEKIGIGVTGSIASTTDTAGGTERQPKDFSKLASNKYECDQINFDFYIRYKTLDLW
ARYQDFQLRIRNAIIKRQSLDFIMAGFNGVKRAETSDRSSNPMLQDVAVGWLQKYRNEAP
ARVMSKVTDEEGHTTSEVIRVGKGGDYASLDALVMDATNNLIEPWYQEDPDLVVIVGRQL
LADKYFPIVNKEQDNSEMLAADVIISQKRIGNLPAVRVPYFPADAMLITKLENLSIYYMD
DSHRRVIEENPKLDRVENYESMNIDYVVEDYAAGCLVEKIKVGDFSTPAKATAEPGA
>OMJLAAIH_00042 Capsid assembly scaffolding protein
MAKKVSKFFRIGVEGDTCDGRVISAQDIQEMAETFDPRVYGCRINLEHLRGILPDGIFKR
YGDVAELKAEKIDDDSALKGKWALFAKITPTDDLIAMNKAAQKVYTSMEIQPNFANTGKC
YLVGLAVTDDPASLGTEYLEFCRTAKHNPLNRFKLSPENLISVATPVELEFEDLPETVFT
ALTEKVKSIFGRKQASDDARLNDVHEAVTAVAEHVQEKLSATEQRLAEMETAFSALKQEV
TDRADETSQAFTRLKNSLDNTESLTQQRRSKATGGGGDALMTNC
>OMJLAAIH_00043 terminase
MTITTDTTLLHDPRRQAALLYWQGFSVPQIAAMLQMKRPTVQSWKQRDGWDSVAPISRVE
MSLEARLTQLIIKPQKTGGDFKEIDLLGRQIERLARVNRYSQTGNEADLNPNVANRNKGG
RRKPKKNFFSDEAIEKLEQIFFEQSFEYQLHWYRAGLEHRIRDILKSRQIGATFYFSREA
LLRALKTGHNQIFLSASKTQAYVFREYIIAFARLVDVDLTGDPIVLGNNGAKLIFLGTNS
NTAQSHNGDLYVDEIFWIPNFQVLRKVASGMASQSHLRSTYFSTPSTLAHDAYPFWSGEL
YNRGRASAAERVEIDVSHNALAGGLLCADGQWRQIVTIEDALKGGCTLFDIEQLKRENSA
DDFKNLFMCEFVDDKASVFPFEELQRCMVDTLEEWEDYAPFAANPFGSRPVWIGYDPSHR
GDSAGCVVLAPPVVAGGKFRILERHQWKGMDFATQAESIRKLTEKYNVEYIGIDATGLGV
GVFQLVRSFYPAARDIRYTPEMKTAMVLKAKDVIRRGCLEYDVSATDITSSFMAIRKTMT
SSGRSATYEASRSEEASHADLAWATMHALLNEPLTAGISTPLTSTILEFY
>OMJLAAIH_00044 putative portal protein
MSKKKGKTPQPAAKKMTASAPKMEAFTFGEPVPVLDRRDILDYVECISNGRWYEPPVSFT
GLAKSLRAAVHHSSPIYVKRNILASTFIPHPWLSQQDFSRFVLDFLVFGNAFLEKRYSTT
GKVIRLETSPAKYTRRGVEEDVYWWVPSFNEPTAFAPGSVFHLLEPDINQELYGLPEYLS
ALNSAWLNESATLFRRKYYENGAHAGYIMYVTDAVQDRNDIEMLRENMVKSKGRNNFKNL
FLYAPQGKADGIKIIPLSEVATKDDFFNIKKASAADLLDAHRIPFQLMGGKPENVGSLGD
IEKVAKVFVRNELIPLQDRIREINGWLGQEVIRFKNYSLDTDNG
